# Supplementary material for: DNA demethylating agent decitabine broadens the peripheral T cell receptor repertoire
Source: PubMed Central journal article supplement (PMC5122357; doi:10.18632/oncotarget.9352), 2016-05-13
Supplement: oncotarget-07-37882-s001.pdf [file oncotarget-07-37882-s001.pdf]

## DNA demethylating agent decitabine broadens the peripheral T cell receptor repertoire

### Supplementary Materials

**Supplementary Table S1: Basic sequencing data**

| Sample    | Total input sequences | Bases processed | Total good sequences | Sequencing information utilization (%) | Clonotype number | Out of frame clones (%) | Clone with stops |
|-----------|-----------------------|-----------------|----------------------|----------------------------------------|------------------|-------------------------|------------------|
| UPN1-pre  | 23399855              | 2810445058      | 10166914             | 43.45                                  | 20719            | 29.3                    | 6.04             |
| UPN1-post | 21601643              | 2606968972      | 8024760              | 37.15                                  | 22913            | 30.18                   | 6.49             |
| UPN2-pre  | 23029114              | 3109435720      | 18336797             | 79.62                                  | 32956            | 28.68                   | 6.36             |
| UPN2-post | 27225099              | 3564482749      | 19718268             | 72.43                                  | 51635            | 32.28                   | 5.71             |
| UPN3-pre  | 20435520              | 2653239398      | 16008873             | 78.34                                  | 48707            | 33.48                   | 6.55             |
| UPN3-post | 21503583              | 2741890167      | 18962896             | 88.18                                  | 120787           | 38.59                   | 6.05             |
| UPN4-pre  | 21170000              | 2550299906      | 10132095             | 47.86                                  | 29592            | 39.17                   | 7.95             |
| UPN4-post | 23055366              | 2834896056      | 13131623             | 56.96                                  | 41455            | 40.19                   | 6.38             |

**Supplementary Table S2: The frequency of various V, D, J genes of TCRβ in each patient**

| Sample   | UPN1-pre | UPN1-post | UPN2-pre | UPN2-post | UPN3-pre | UPN3-post | UPN4-pre | UPN4-post |
|----------|----------|-----------|----------|-----------|----------|-----------|----------|-----------|
| TRBD1    | 0.437593 | 0.449369  | 0.585629 | 0.481434  | 0.497668 | 0.482417  | 0.431062 | 0.479294  |
| TRBD2    | 0.562407 | 0.550631  | 0.414371 | 0.518566  | 0.502332 | 0.517583  | 0.568938 | 0.520706  |
| TRBJ1-3  | 0.010604 | 0.012244  | 0.006165 | 0.016612  | 0.007455 | 0.016398  | 0.012689 | 0.0245    |
| TRBJ2-5  | 0.105545 | 0.091431  | 0.051204 | 0.106191  | 0.142077 | 0.136918  | 0.132343 | 0.13153   |
| TRBJ1-5  | 0.030198 | 0.038798  | 0.093389 | 0.031701  | 0.025499 | 0.039351  | 0.031458 | 0.043887  |
| TRBJ2-2  | 0.04104  | 0.050944  | 0.020729 | 0.036614  | 0.049974 | 0.031379  | 0.044532 | 0.045967  |
| TRBJ1-6  | 0.025982 | 0.053725  | 0.022896 | 0.037356  | 0.0318   | 0.054172  | 0.036205 | 0.06284   |
| TRBJ1-2  | 0.049437 | 0.050586  | 0.044063 | 0.063952  | 0.063419 | 0.104009  | 0.045142 | 0.074317  |
| TRBJ2-6  | 0.004755 | 0.012586  | 0.011264 | 0.005495  | 0.004862 | 0.007114  | 0.009327 | 0.00937   |
| TRBJ2-3  | 0.069103 | 0.094353  | 0.132156 | 0.076033  | 0.074774 | 0.068227  | 0.123263 | 0.087062  |
| TRBJ1-1  | 0.084805 | 0.06412   | 0.234392 | 0.053196  | 0.064815 | 0.06506   | 0.100981 | 0.086004  |
| TRBJ2-1  | 0.15033  | 0.192195  | 0.116689 | 0.206131  | 0.196563 | 0.16636   | 0.190458 | 0.163768  |
| TRBJ2-4  | 0.002833 | 0.003652  | 0.002339 | 0.004673  | 0.004719 | 0.005702  | 0.004088 | 0.004024  |
| TRBJ1-4  | 0.042552 | 0.028767  | 0.024518 | 0.01217   | 0.009944 | 0.009504  | 0.019036 | 0.023135  |
| TRBJ2-7  | 0.382815 | 0.3066    | 0.240196 | 0.349876  | 0.324099 | 0.295805  | 0.250478 | 0.243596  |
| TRBV11-1 | 0.011168 | 0.002963  | 0.00069  | 0.001623  | 0.000605 | 0.000673  | 0.002164 | 0.001153  |
| TRBV3-1  | 0.000639 | 0.00141   | 0.000811 | 0.002134  | 0.000948 | 0.001427  | 0.001074 | 0.001596  |
| TRBV19   | 0.055228 | 0.109126  | 0.054513 | 0.048675  | 0.05378  | 0.051152  | 0.047199 | 0.049546  |
| TRBV9    | 0.060286 | 0.033867  | 0.017866 | 0.024175  | 0.064213 | 0.030242  | 0.026507 | 0.036907  |
| TRBV6-2  | 0.006941 | 0.00529   | 0.003255 | 0.008312  | 0.003878 | 0.002073  | 0.003183 | 0.001499  |
| TRBV30   | 0.000146 | 0.000532  | 0.000511 | 0.000573  | 0.00008  | 0.000216  | 0.000199 | 0.000487  |
| TRBV6-5  | 0.007108 | 0.016284  | 0.008597 | 0.017691  | 0.025795 | 0.007086  | 0.012945 | 0.013449  |
| TRBV7-3  | 0.044469 | 0.029009  | 0.018314 | 0.054694  | 0.018194 | 0.023404  | 0.088986 | 0.043482  |
| TRBV7-4  | 0.001437 | 0.001912  | 0.000704 | 0.000967  | 0.001649 | 0.001483  | 0.00479  | 0.001399  |
| TRBV6-6  | 0.004712 | 0.007115  | 0.00448  | 0.004031  | 0.002256 | 0.002256  | 0.005744 | 0.00587   |
| TRBV25-1 | 0.023078 | 0.027657  | 0.008594 | 0.028789  | 0.036708 | 0.046858  | 0.045471 | 0.028155  |
| TRBV18   | 0.000048 | 0.000111  | 0.000138 | 0.000808  | 0.00009  | 0.000232  | 0.000233 | 0.000187  |
| TRBV6-3  | 0.006941 | 0.00529   | 0.003255 | 0.008312  | 0.003878 | 0.002073  | 0.003183 | 0.001499  |
| TRBV5-1  | 0.034715 | 0.043221  | 0.025294 | 0.033003  | 0.034972 | 0.018227  | 0.034074 | 0.038247  |

|          |          |          |          |          |          |          |          |          |
|----------|----------|----------|----------|----------|----------|----------|----------|----------|
| TRBV12-4 | 0.027961 | 0.022087 | 0.015358 | 0.019476 | 0.016581 | 0.012363 | 0.01159  | 0.022289 |
| TRBV4-1  | 0.003298 | 0.004914 | 0.013395 | 0.006607 | 0.002967 | 0.00239  | 0.002669 | 0.005911 |
| TRBV7-1  | 0.00005  | 0.000024 | 0.000034 | 0.000001 | 0.000003 | 0.000024 | 0.000018 | 0.000075 |
| TRBV15   | 0.017384 | 0.028289 | 0.011738 | 0.044012 | 0.043555 | 0.065403 | 0.035757 | 0.033639 |
| TRBV11-3 | 0.00151  | 0.006203 | 0.002578 | 0.005662 | 0.004124 | 0.004222 | 0.003119 | 0.003047 |
| TRBV6-1  | 0.00505  | 0.012586 | 0.003837 | 0.007889 | 0.005648 | 0.004138 | 0.011233 | 0.01237  |
| TRBV10-1 | 0.016826 | 0.015604 | 0.039016 | 0.013846 | 0.014495 | 0.022692 | 0.022652 | 0.019335 |
| TRBV29-1 | 0.04425  | 0.051447 | 0.017048 | 0.042645 | 0.086974 | 0.092434 | 0.060436 | 0.055566 |
| TRBV7-7  | 0.005565 | 0.007707 | 0.004297 | 0.006935 | 0.006837 | 0.007463 | 0.011033 | 0.007741 |
| TRBV4-3  | 0.00506  | 0.003561 | 0.001063 | 0.003968 | 0.001466 | 0.001369 | 0.00243  | 0.000125 |
| TRBV23-1 | 0.000005 | 0.000016 | 0.000005 | 0.000004 | 0.000025 | 0.000006 | 0.000007 | 0.00009  |
| TRBV20-1 | 0.107693 | 0.148652 | 0.102508 | 0.190904 | 0.109942 | 0.123554 | 0.150775 | 0.169168 |
| TRBV28   | 0.001414 | 0.004671 | 0.003191 | 0.003343 | 0.00153  | 0.001687 | 0.002415 | 0.002952 |
| TRBV6-7  | 0.000014 | 0.000562 | 0.000127 | 0.000415 | 0.00015  | 0.000093 | 0.000449 | 0.000437 |
| TRBV6-4  | 0.002775 | 0.005493 | 0.005465 | 0.010999 | 0.001206 | 0.001445 | 0.003739 | 0.010882 |
| TRBV2    | 0.038481 | 0.049264 | 0.019515 | 0.036836 | 0.034666 | 0.079777 | 0.054269 | 0.074585 |
| TRBV27   | 0.000714 | 0.002501 | 0.00196  | 0.001986 | 0.000434 | 0.00129  | 0.000881 | 0.001282 |
| TRBV7-2  | 0.042734 | 0.059995 | 0.017997 | 0.041522 | 0.060274 | 0.064234 | 0.082211 | 0.04663  |
| TRBV5-8  | 0.001015 | 0.002503 | 0.003268 | 0.002914 | 0.002114 | 0.001489 | 0.002332 | 0.003596 |
| TRBV13   | 0.001171 | 0.003608 | 0.001683 | 0.004026 | 0.001658 | 0.00236  | 0.002225 | 0.002195 |
| TRBV21-1 | 0.000165 | 0.000283 | 0.000006 | 0.00013  | 0.000008 | 0.000028 | 0.000068 | 0.000088 |
| TRBV12-5 | 0.000493 | 0.001236 | 0.0004   | 0.0017   | 0.00034  | 0.000456 | 0.001137 | 0.001497 |
| TRBV5-5  | 0.002882 | 0.004431 | 0.007678 | 0.004102 | 0.002281 | 0.003133 | 0.003953 | 0.005432 |
| TRBV7-9  | 0.063351 | 0.05482  | 0.27284  | 0.061104 | 0.094739 | 0.068624 | 0.053614 | 0.066034 |
| TRBV10-3 | 0.038307 | 0.03269  | 0.095071 | 0.04414  | 0.045518 | 0.079688 | 0.047773 | 0.061161 |
| TRBV5-6  | 0.012504 | 0.01641  | 0.014403 | 0.011829 | 0.011511 | 0.006764 | 0.015907 | 0.008859 |
| TRBV7-6  | 0.013188 | 0.016712 | 0.007264 | 0.018073 | 0.016855 | 0.01767  | 0.019151 | 0.017641 |
| TRBV10-2 | 0.02987  | 0.017549 | 0.068264 | 0.013316 | 0.01666  | 0.019042 | 0.013666 | 0.013357 |
| TRBV16   | 0.000912 | 0.000326 | 0.000143 | 0.000444 | 0.000226 | 0.000319 | 0.000333 | 0.000322 |
| TRBV5-4  | 0.008151 | 0.016067 | 0.005178 | 0.009483 | 0.002969 | 0.004594 | 0.009106 | 0.014595 |
| TRBV7-8  | 0.024175 | 0.028645 | 0.010389 | 0.02045  | 0.074783 | 0.03699  | 0.024852 | 0.026275 |
| TRBV24-1 | 0.172016 | 0.05063  | 0.051696 | 0.061547 | 0.037904 | 0.049155 | 0.044048 | 0.047456 |
| TRBV12-3 | 0.027961 | 0.022087 | 0.015358 | 0.019476 | 0.016581 | 0.012363 | 0.01159  | 0.022289 |
| TRBV11-2 | 0.002964 | 0.009375 | 0.00763  | 0.007987 | 0.007312 | 0.008593 | 0.008271 | 0.009544 |
| TRBV4-2  | 0.000861 | 0.002379 | 0.004236 | 0.003972 | 0.005938 | 0.002492 | 0.002397 | 0.003041 |
| TRBV14   | 0.022313 | 0.012884 | 0.02834  | 0.044471 | 0.024679 | 0.014254 | 0.008141 | 0.007017 |
